# Supplementary material
Source: publisher site journal article supplement (https://www.dovepress.com/article/453046)
Supplement: Supplementary file 1 [file get_supplementary_file.php]

**Supplementary materials**

**eTable 1.** Hyperparameter definition with nested 10-fold cross-validation

| Models | Hyperparameter | Fixed values (All features) |
| --- | --- | --- |
| XGBoost | Learning rate | 0.1 |
| Max tree depth | 4 |
| Min child weight | 4 |
| Regularization strength | 0.5 |
| LightGBM | Learning rate | 0.001 |
| Max tree depth | 20 |
| Number of estimators | 50 |
| Number of leaves | 100 |
| AdaBoost | Learning rate | 0.1 |
| Number of leaves | 100 |
| GNB | Priors | None |
| Var_smoothing | 1e-07 |
| CNB | Alpha (Laplace / Lidstone) | 0 |
| MLP | Hidden layer sizes | (30, 30) |
| Max_iter | 20 |

| Models | XGBoost | LightGBM | AdaBoost | GNB | CNB | MLP |
| --- | --- | --- | --- | --- | --- | --- |
| XGBoost | NA | 0.357 | 0.569 | 0.5 | 0.347 | 0.583 |
| LightGBM | 0.357 | NA | 0.355 | 0.336 | 0.423 | 0.427 |
| AdaBoost | 0.569 | 0.355 | NA | 0.612 | 0.477 | 0.653 |
| GNB | 0.5 | 0.336 | 0.612 | NA | 0.485 | 0.552 |
| CNB | 0.347 | 0.423 | 0.477 | 0.485 | NA | 0.302 |
| MLP | 0.583 | 0.427 | 0.653 | 0.552 | 0.302 | NA |

**eTable 2.** The Delong test for AUC results of each machine learning model

**eTable 3.** The performance of XGBoost model in train, validation and test sets.

| AUC | Sets | Accuracy | Sensitivity | Specificity | PPV | NPV | F1-Score |
| --- | --- | --- | --- | --- | --- | --- | --- |
| 0.854 | Train | 0.779 | 0.754 | 0.810 | 0.788 | 0.773 | 0.770 |
| 0.856 | Validation | 0.778 | 0.760 | 0.846 | 0.787 | 0.776 | 0.771 |
| 0.804 | Test | 0.74 | 0.775 | 0.728 | 0.747 | 0.733 | 0.761 |


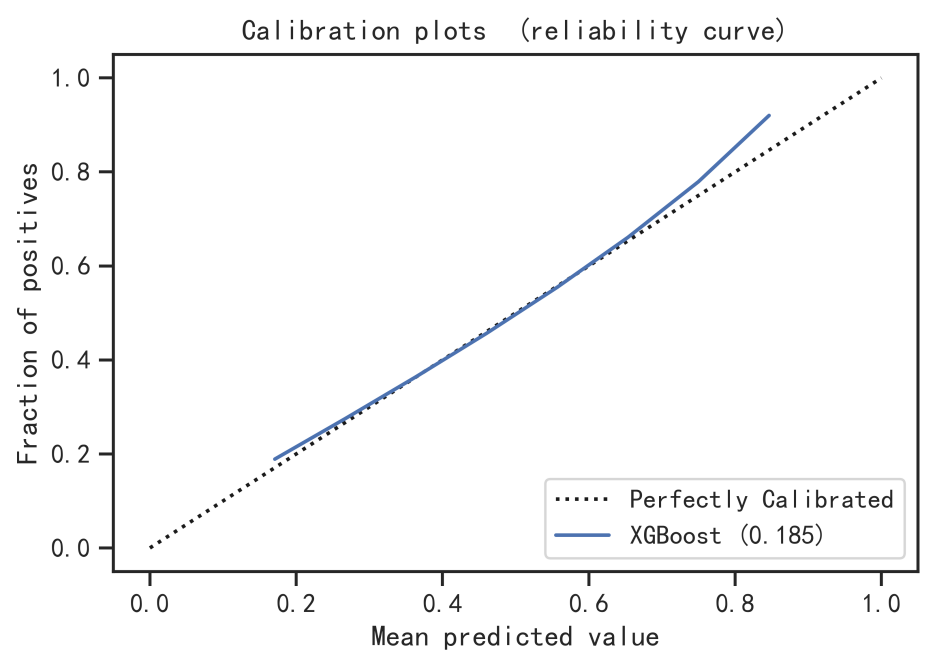


**eFigure 1.** The calibration plots for XGBoost model


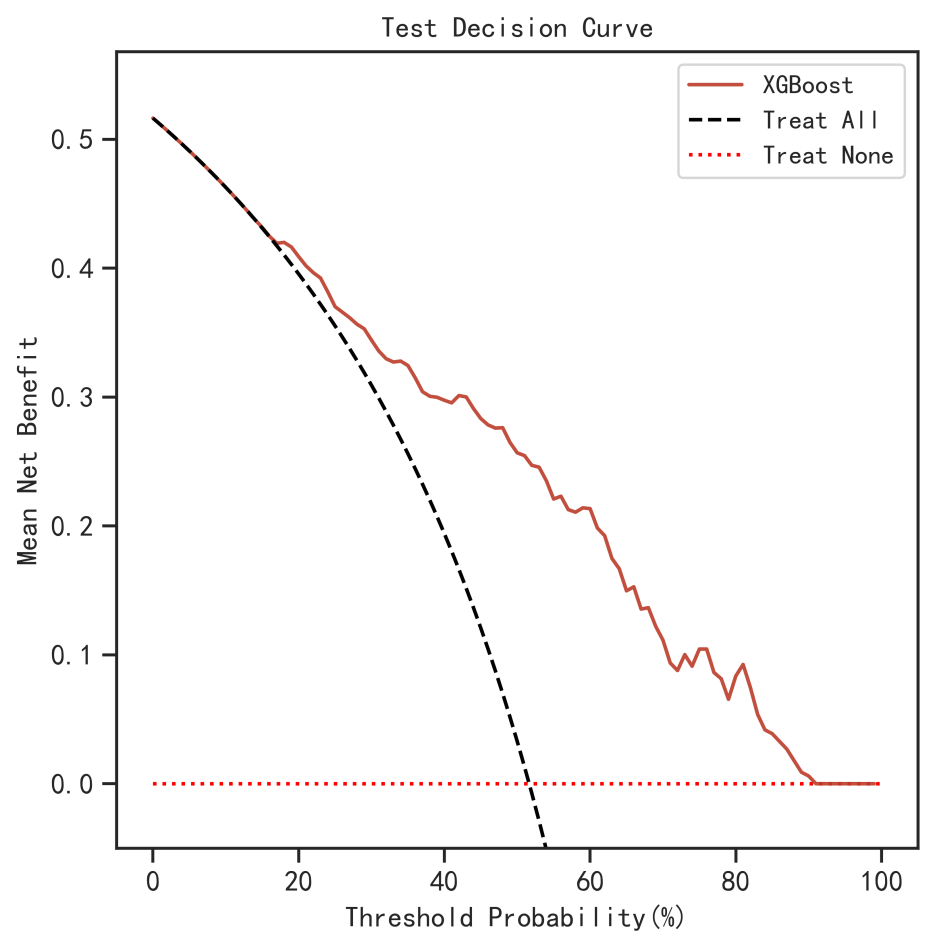


**eFigure 2.** The DCA curve for XGBoost model
